# Supplementary material for: The transcription factor Pou3f1 promotes neural fate commitment via activation of neural lineage genes and inhibition of external signaling pathways
Source: eLife journal article supplement (doi:10.7554/elife.02224), 2014-06-14
Supplement: supp [file elife_poa_e02224_Figure_3_figure_supplement_1.pdf › elife_poa_e02224_Figure_3_figure_supplement_1.pdf]

| Injected cell line | Stage of embryos | Number of deciduas | Number of embryos | Number of chimeras | Chimeras / embryo (%) |
|--------------------|------------------|--------------------|-------------------|--------------------|-----------------------|
| Vector/R1          | E9.0-E9.5        | 42                 | 27                | 15                 | 56%                   |
| Pou3f1-OE/R1       | E9.0-E9.5        | 87                 | 58                | 48                 | 82%                   |
| Pou3f1 KD/R1       | E9.0-E9.5        | 54                 | 39                | 26                 | 67%                   |

**Figure 3—figure supplement 1**
