# Supplementary figures and images for: The transcription factor Pou3f1 promotes neural fate commitment via activation of neural lineage genes and inhibition of external signaling pathways
Source: eLife journal article supplement (doi:10.7554/elife.02224), 2014-06-14

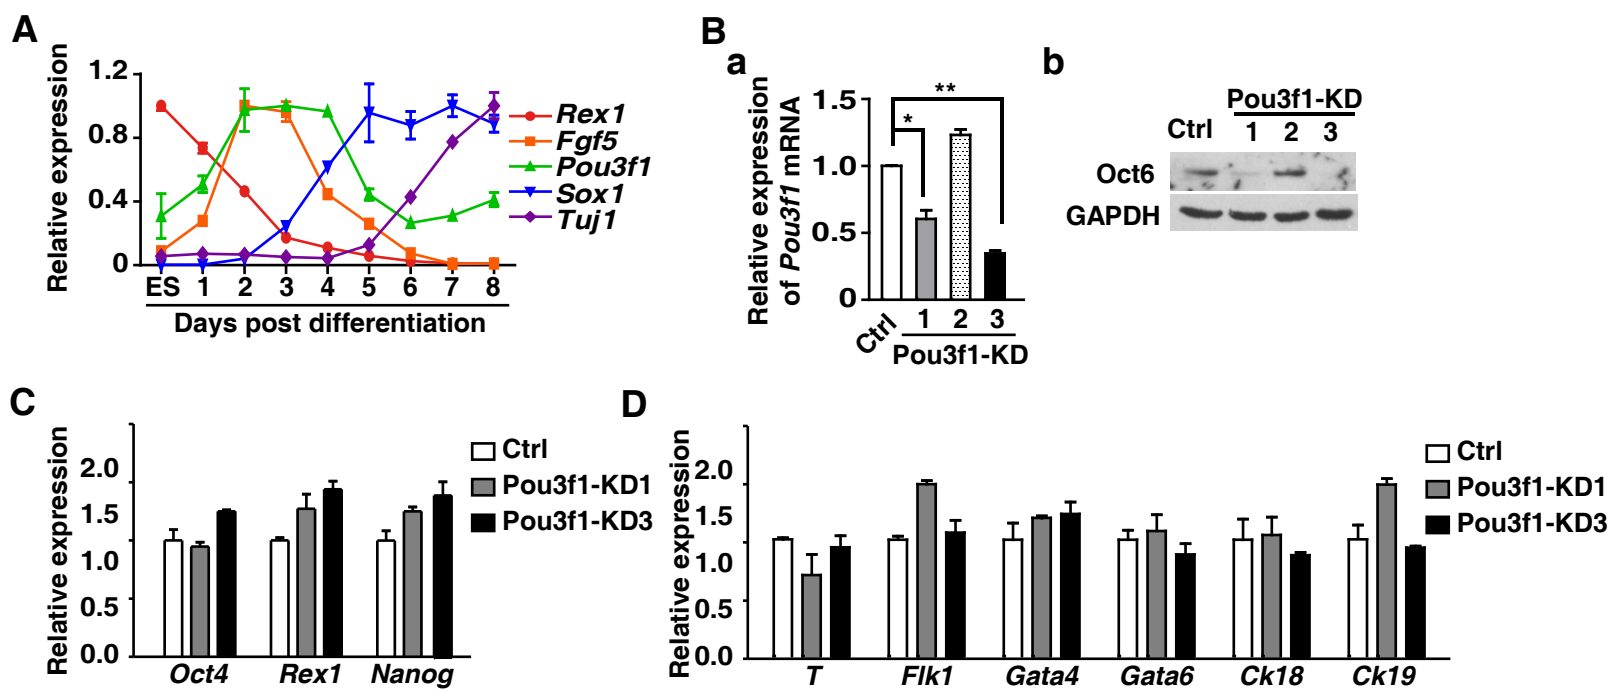

Figure 1–figure supplement 1

Supplement: supp [file elife_poa_e02224_Figure_1_figure_supplement_1.pdf › elife_poa_e02224_Figure_1_figure_supplement_1.pdf]

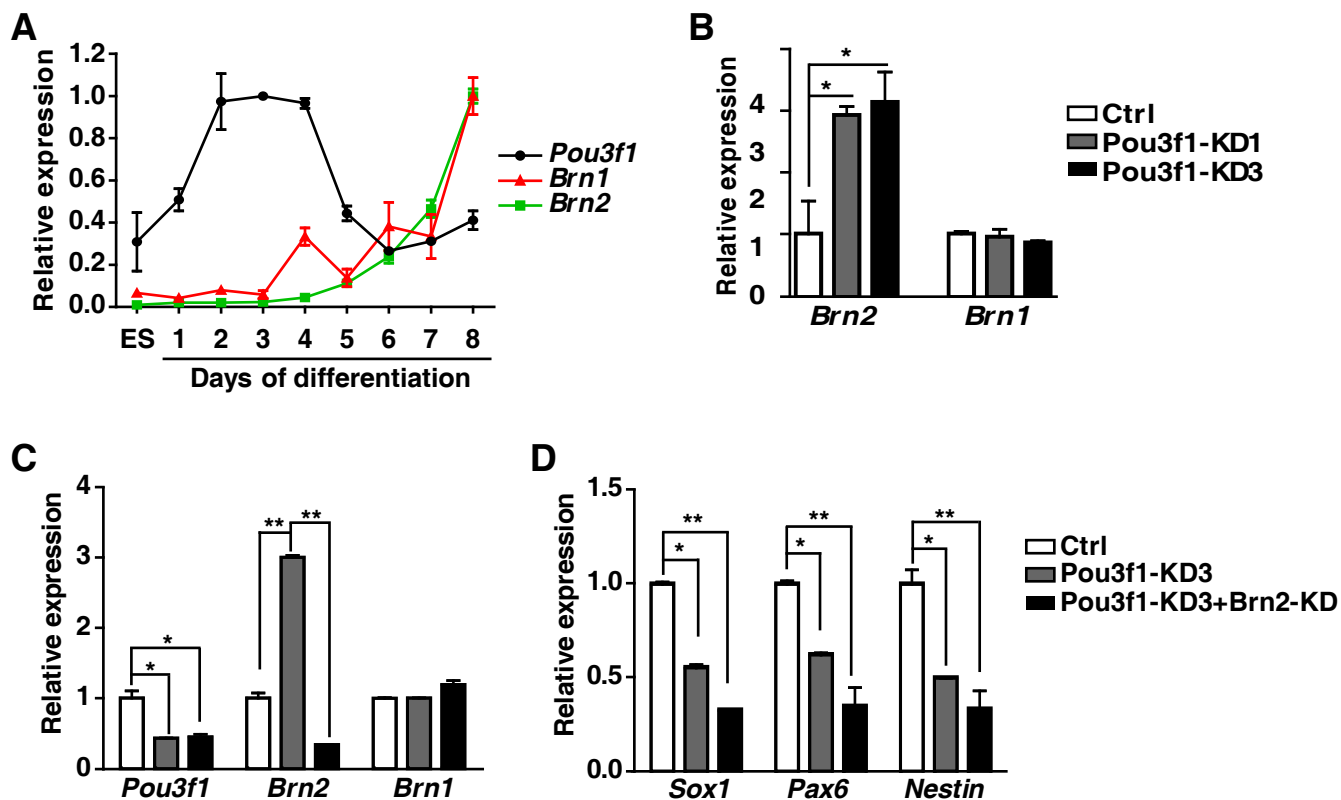

Figure 1 - figure supplement 2

Supplement: supp [file elife_poa_e02224_Figure_1_figure_supplement_2.pdf › elife_poa_e02224_Figure_1_figure_supplement_2.pdf]

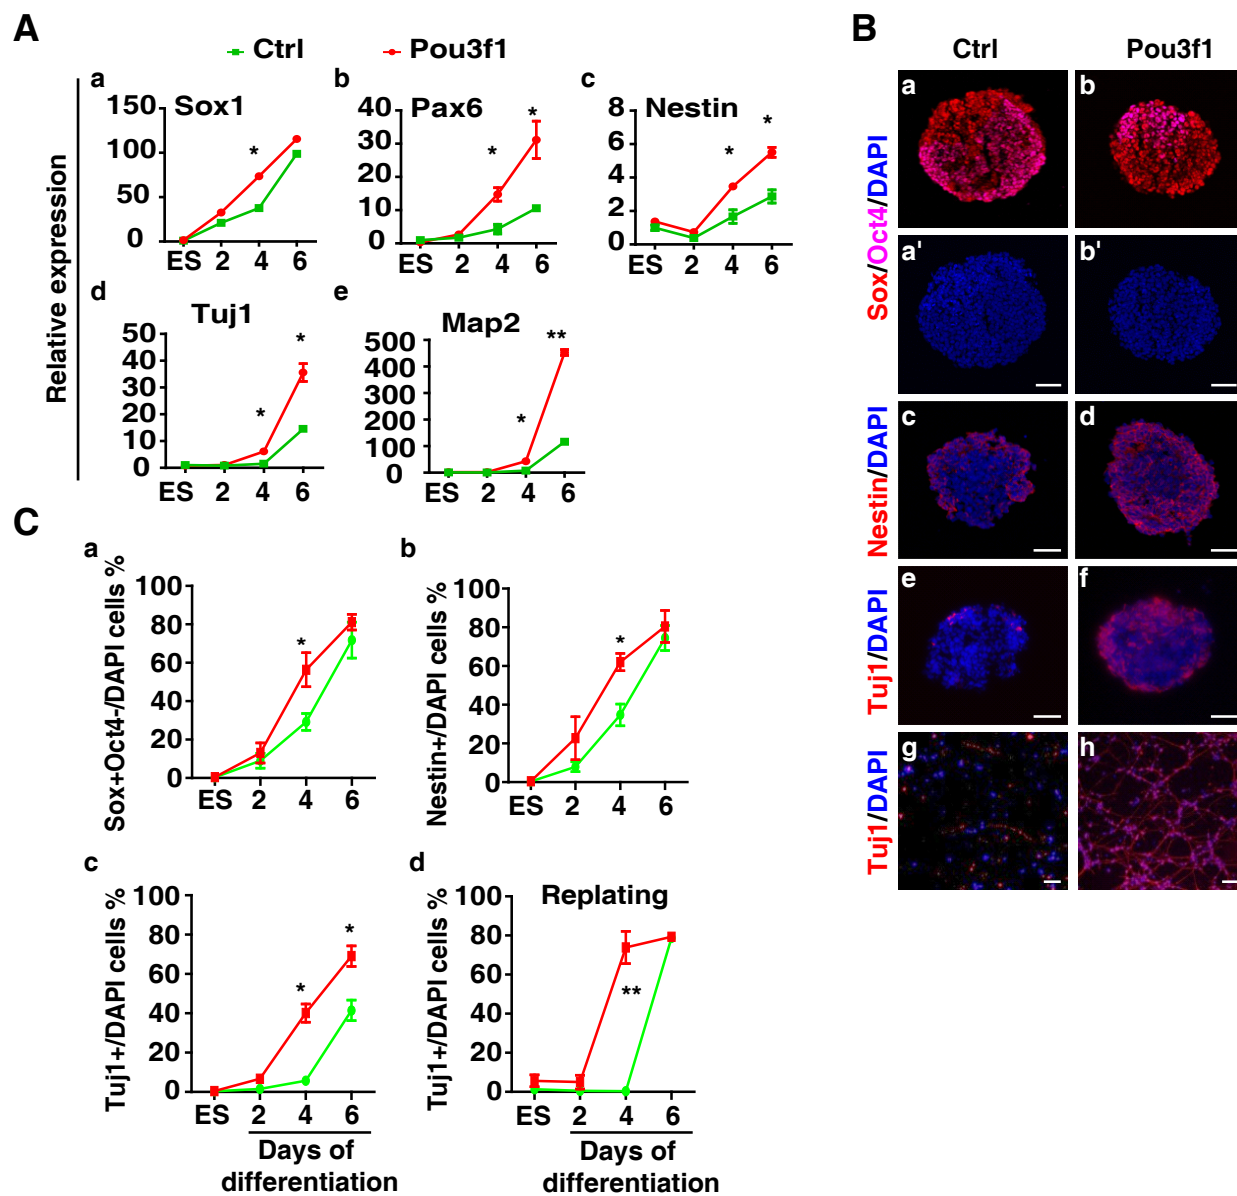

Supplement: supp [file elife_poa_e02224_Figure_1_figure_supplement_3.pdf › elife_poa_e02224_Figure_1_figure_supplement_3.pdf]

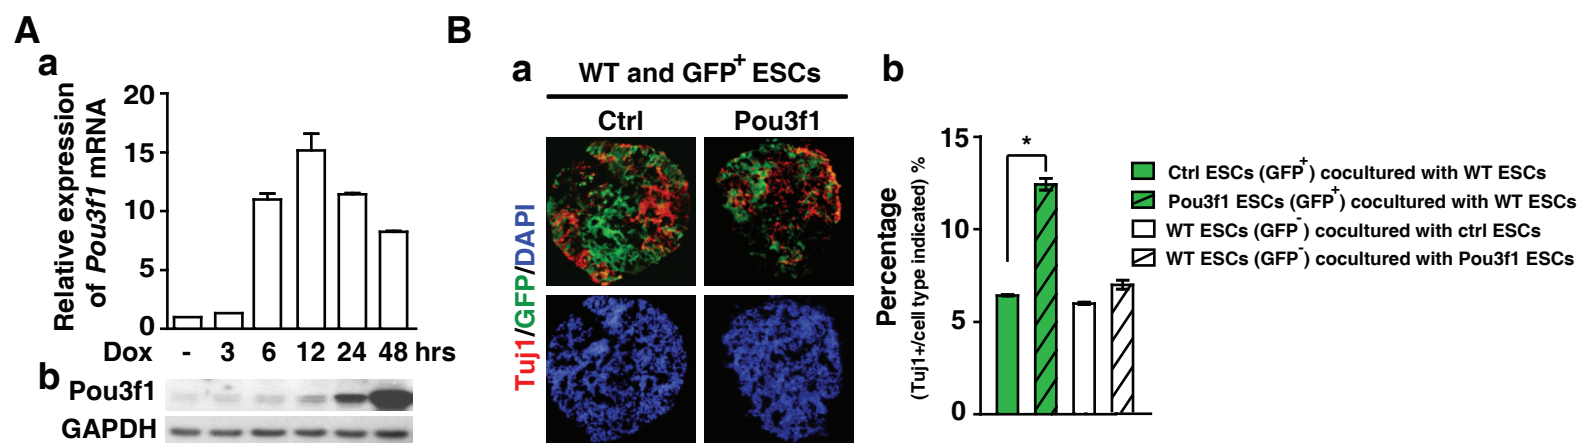

Figure 1–figure supplement 4

Supplement: supp [file elife_poa_e02224_Figure_1_figure_supplement_4.pdf › elife_poa_e02224_Figure_1_figure_supplement_4.pdf]

**A**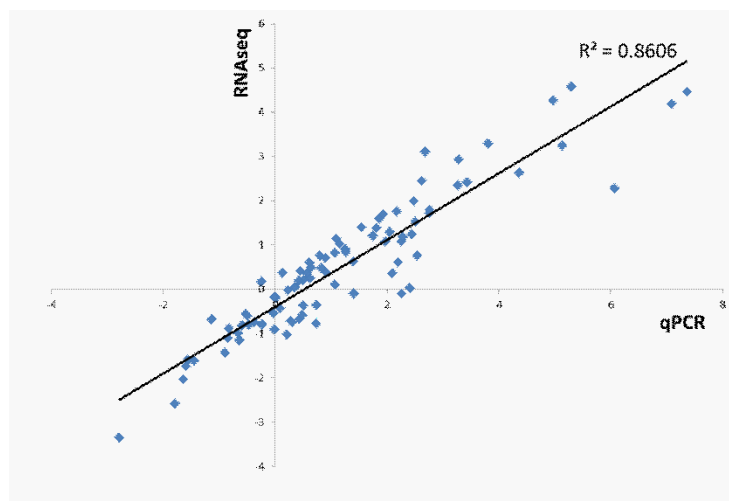**B**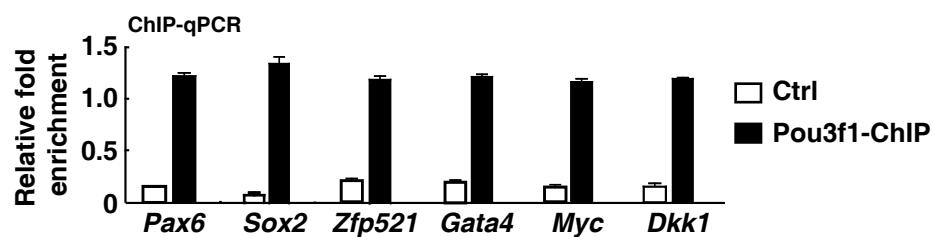**C**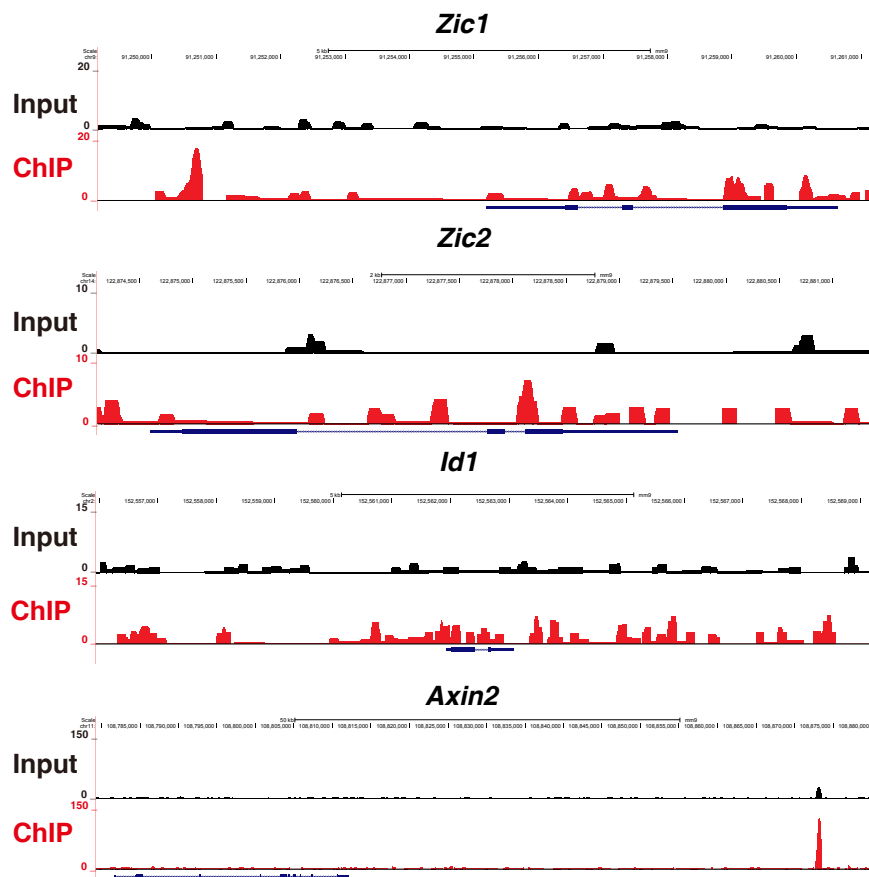

**Figure 4—figure supplement 1**

Supplement: supp [file elife_poa_e02224_Figure_4_figure_supplement_1.pdf › elife_poa_e02224_Figure_4_figure_supplement_1.pdf]

**A**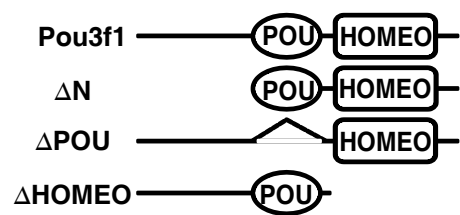**B**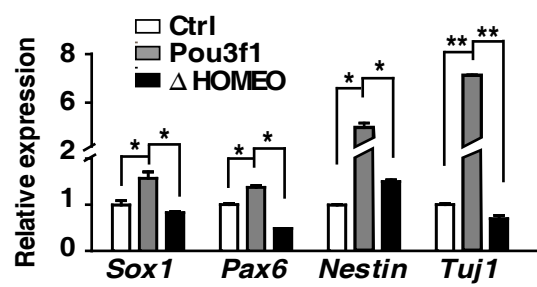

Figure 5—figure supplement 1

Supplement: supp [file elife_poa_e02224_Figure_5_figure_supplement_1.pdf › elife_poa_e02224_Figure_5_figure_supplement_1.pdf]

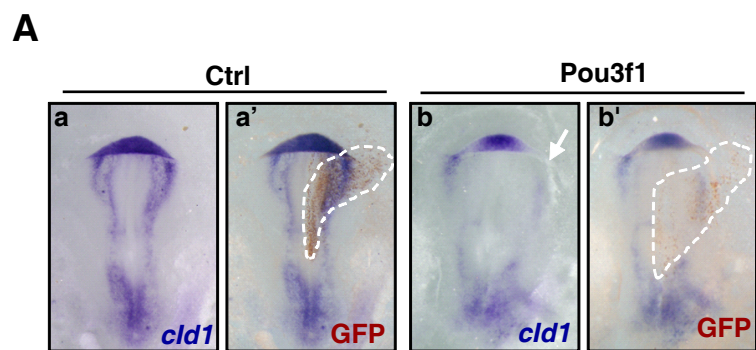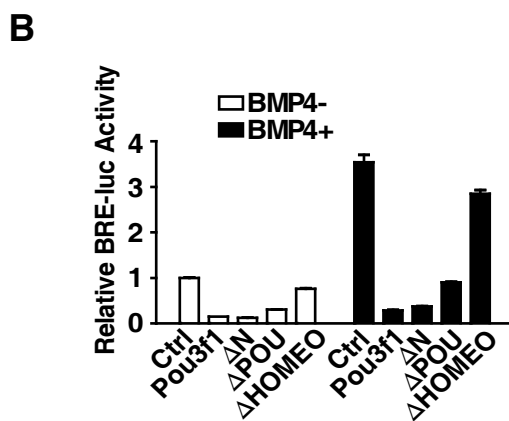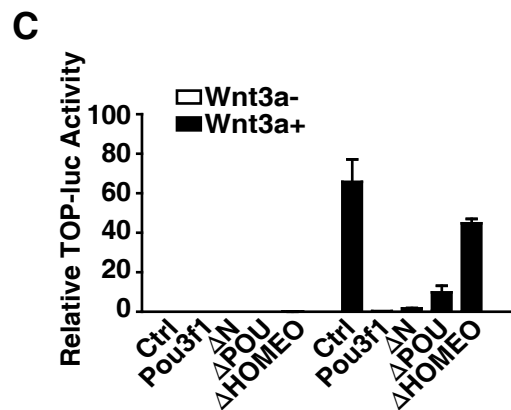

Figure 6–figure supplement 1

Supplement: supp [file elife_poa_e02224_Figure_6_figure_supplement_1.pdf › elife_poa_e02224_Figure_6_figure_supplement_1.pdf]
